# Supplementary material for: Noncanonical amino acid incorporation enables minimally disruptive labeling of stress granule and TDP-43 proteinopathy
Source: eLife journal article supplement (doi:10.7554/elife.109452), 2025-12-10

Source data for Figure 1K

TDP-43

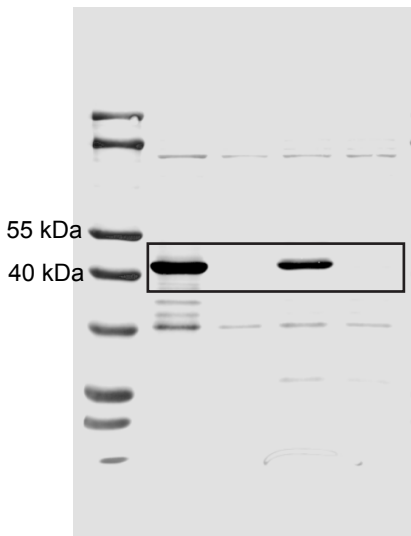

PFKP

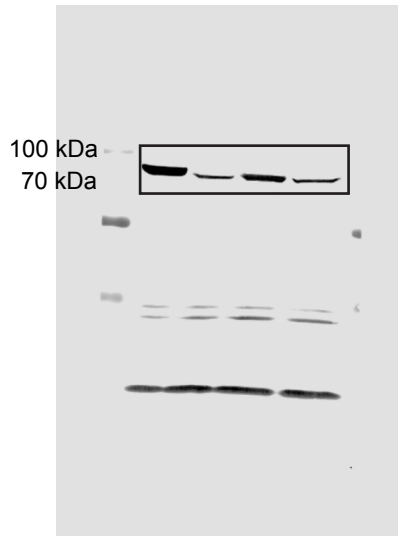

GAPDH

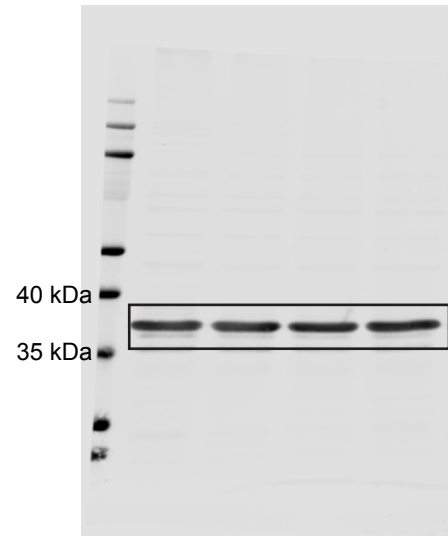

Source data for Figure 1H

G3BP1

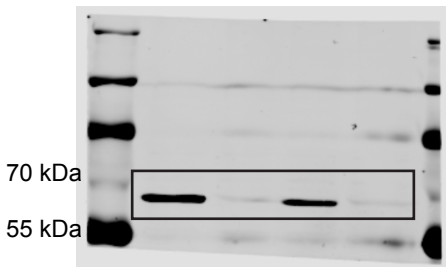

GAPDH

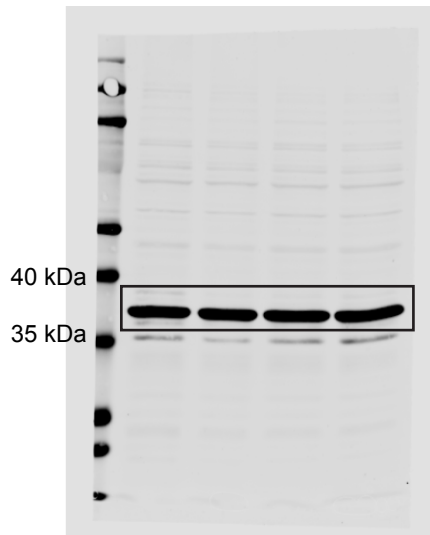

Supplement: fig1-data2 [file elife-109452-fig1-data2-v1.pdf]
