# Supplementary material for: Non-canonical amino acid incorporation enables minimally disruptive labeling of stress granule and TDP-43 proteinopathy
Source: eLife. 2026 Jul 3;14:RP109452. doi: 10.7554/eLife.109452 (PMC13331479; doi:10.7554/eLife.109452)
Supplement: Figure 1—source data 1. [file elife-109452-fig1-data1.xlsx]

## Sheet: Sheet1
Source data for Figure 1F
Times(s)	G3BP1-Anap (% fluorescence recovery)			G3BP1-GFP (% fluorescence recovery)
	Replicate 1	Replicate 2	Replicate 3	Replicate 1	Replicate 2	Replicate 3
0	0	0	0	0	0	0
5	32.4195	25.9672	30.0561	20.0061	18.3455	15.2622
10	44.6647	40.0596	45.5565	28.142	30.1339	26.0833
15	52.4727	55.3416	51.1382	31.1928	33.172	30.0243
20	53.1799	50.2305	55.3818	33.9397	35.2663	31.0489
25	55.5953	49.1587	57.1189	33.1137	31.3796	36.1079
30	56.3954	51.2523	52.2158	34.2183	31.9671	35.0388
Source data for Figure 1G
Time(s)	TDP-43-Anap (% fluorescence recovery)			TDP-43ΔNLS-YFP (% fluorescence recovery)
	Replicate1	Replicate2	Replicate3	Replicate1	Replicate2	Replicate3
0	0	0	0	0	0	0
5	26.9129	27.7672	23.0487	8.94983	7.93485	6.80638
10	38.4634	34.9833	33.1617	13.2212	12.1945	14.5412
15	45.0669	40.1783	47.2708	18.6426	19.4443	18.3759
20	46.8163	42.0205	42.9368	21.3226	21.5037	22.3172
25	42.0136	44.1393	46.8766	22.6183	22.1227	21.5318
30	46.1863	45.3275	40.3317	22.3604	21.5478	22.2812
Source data for Figure 1L
	PFKP/GAPDH
	TDP-43 WT	TDP-43 KO	KO+V100Anap	KO+V100Stop
Replicate 1	1.80035	0.345566	0.872263	0.406967
Replicate 2	1.78142	0.352339	0.844037	0.427083
Replicate 3	1.56148	0.343669	0.79494	0.389049
Source data for Figure 1M
	Survival rate
	Hela WT	TDP-43 KO	KO + OE	KO + V100Stop	KO + V100Anap
Replicate 1	0.599941	0.25339	0.483139	0.325656	0.466818
Replicate 2	0.555627	0.265799	0.431427	0.302405	0.445121
Replicate 3	0.540385	0.260863	0.463005	0.298048	0.421825
Source data for Figure 1N
	Survival rate
	TDP-43 KO	KO + OE	KO + V100Stop	KO + V100Anap
Replicate 1	0.332368	0.519933	0.335679	0.496563
Replicate 2	0.31352	0.506678	0.30139	0.450982
Replicate 3	0.355376	0.484283	0.318022	0.46516
